# Supplementary material
Source: PubMed Central journal article supplement (PMC4384644)

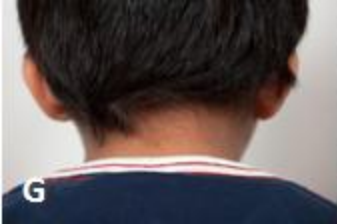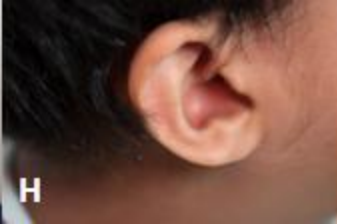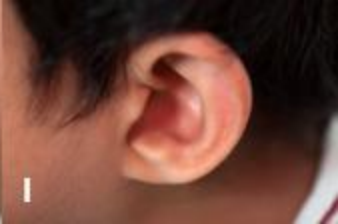

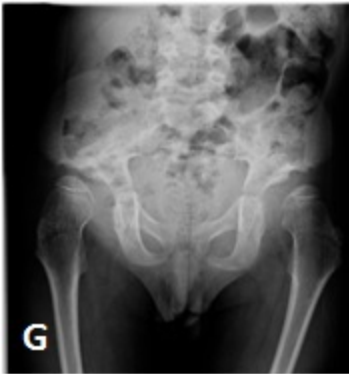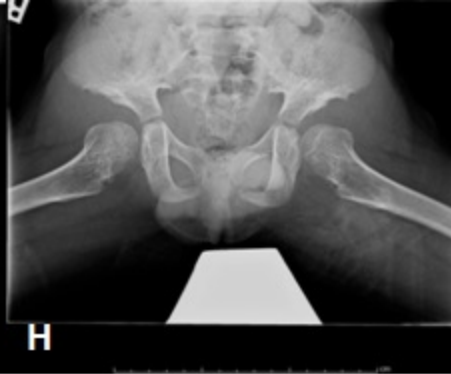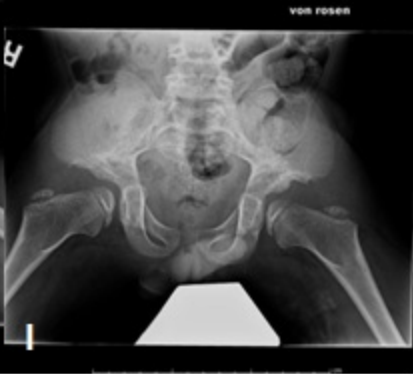

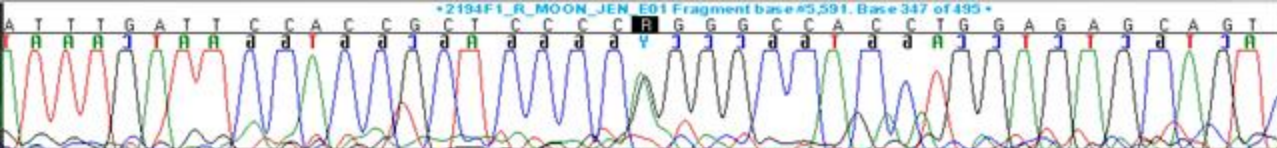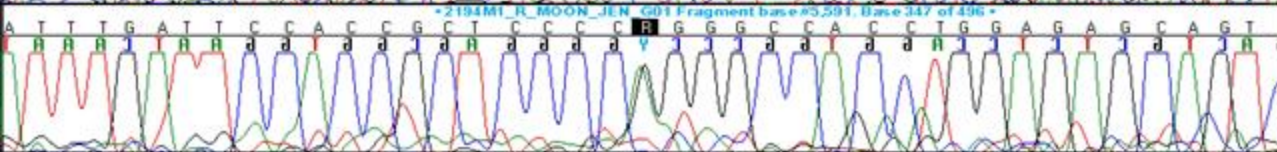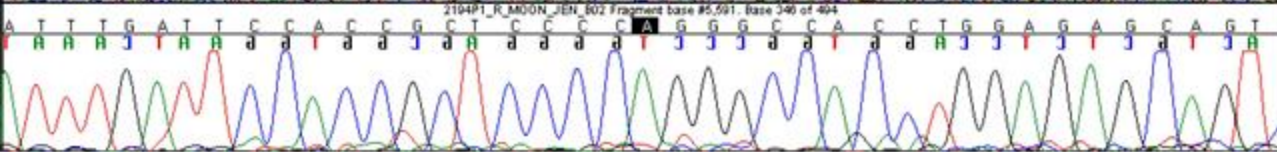

Supplement: NIHMS672920-supplement-Supp_FigureS1-S3.pdf [file NIHMS672920-supplement-Supp_FigureS1-S3.pdf]
